# Supplementary material for: Seemingly simple group 8 cyclopentadienyl dicarbonyl metal halides: From little things, interesting things grow
Source: Royal Society of Chemistry journal article supplement (doi:10.1039/c1ce05439b), 2011-11-30
Supplement: c1ce05439b.pdf [file c1ce05439b.pdf]

Electronic Supplementary Information (ESI)

## Seemingly simple group 8 cyclopentadienyl metal halides: From little things, interesting things grow.<sup>†</sup>

Rebecca O. Fuller, Christopher S. Griffith, George A. Koutsantonis, Kim M. Lapere, Brian W. Skelton, Mark A. Spackman, Allan H. White<sup>a</sup> and Duncan A. Wild.

**Table S1.** Comparative geometries, [CpM(CO)<sub>2</sub>Cl] (M = Fe, Ru, Os)

Data for the Fe compound, ref.<sup>10</sup>, other: this work

| M                | Fe (295 K) <sup>10</sup> | Ru (296 K)             | Os                                         |
|------------------|--------------------------|------------------------|--------------------------------------------|
| Distances (Å)    |                          |                        |                                            |
| M-C(Cp)          | 2.046(8)                 | 2.191(3)               | 2.202(6)                                   |
|                  | -2.097(7)                | -2.258(3)              | -2.299(6)                                  |
| < >              | 2.06 <sub>9</sub>        | 2.22 <sub>3</sub>      | 2.24 <sub>7</sub>                          |
| M-C(0)(Cp)       | 1.71 <sub>2</sub>        | 1.87 <sub>2</sub>      | 1.88 <sub>8</sub>                          |
| M-C(CO)          | 1.774(5),<br>1.767(6)    | 1.883(3),<br>1.890(3)  | 1.884(6),<br>1.896(6)                      |
| M-Cl             | 2.288(2)                 | 2.4110(8)              | 2.4153(14)                                 |
| Angles (degrees) |                          |                        |                                            |
| C(0)-M-Cl        | 122.8                    | 123.3                  | 121.3 <sub>7</sub>                         |
| C(0)-M-C(CO)     | 122.9,<br>125.2          | 124.6,<br>126.4        | 124.0 <sub>1</sub> ,<br>127.3 <sub>9</sub> |
| C(CO)-M-C(CO)    | 94.0(3)                  | 91.01(4)               | 90.4(3)                                    |
| Cl-M-C(CO)       | 91.8(2),<br>91.1(2)      | 90.81(11),<br>90.24(9) | 92.6(2),<br>91.2(2)                        |

\*Values cited pertain to the major component of the chlorine atom and to the non-disordered carbonyl carbon. The  $P2_1/n$  phase is common to both Ru and Os analogues; however, the determination of the Ru complex was executed at 296 K.

**Table S2.** Comparative geometries,  $[\text{Cp}^{(\text{I})}\text{Ru}(\text{CO})_2\text{X}]$  (X = Cl, Br, I)\*

(a) Cp complexes

| $\text{X}^{(\text{Ref})}$ | Cl                     | Br (296 K) <sup>1</sup> | Br-S ( $\alpha$ ) <sup>16</sup> | Br-S ( $\beta$ )(mol.1) <sup>16</sup> | (mol.2) <sup>16</sup> | I (173 K) <sup>3,†</sup> | Cl(Os)*               |
|---------------------------|------------------------|-------------------------|---------------------------------|---------------------------------------|-----------------------|--------------------------|-----------------------|
| Distances (Å)             |                        |                         |                                 |                                       |                       |                          |                       |
| Ru-C(Cp)                  | 2.191(3)               | 2.16(2)                 | 2.186(8)                        | 2.208(6)                              | 2.196(7)              | 2.213(8)                 | 2.202(6)              |
|                           | -2.258(3)              | -2.26(3)                | -2.240(5)                       | -2/263(7)                             | -2.260(7)             | -2.271(3)                | -2.299(6)             |
| < >                       | 2.22 <sub>3</sub>      | 2.22                    | 2.21 <sub>4</sub>               | 2.23 <sub>5</sub>                     | 2.22 <sub>9</sub>     | 2.24                     | 2.24 <sub>7</sub>     |
| Ru-C(0)(Cp)               | 1.87 <sub>2</sub>      | 1.87                    | 1.87 <sub>0</sub>               | 1.88 <sub>0</sub>                     | 1.87 <sub>9</sub>     | 1.88 <sub>8</sub>        | 1.88 <sub>8</sub>     |
| Ru-C(CO)                  | 1.883(3),<br>1.890(3)  | 1.895(16),<br>1.853(17) | 1.884(8),<br>1.922(7)           | 1.902(7),<br>1.883(7)                 | 1.887(7),<br>1.891(8) | 1.869(6),<br>1.865(6)    | 1.884(6),<br>1.896(6) |
| Ru-X                      | 2.4110(8)              | 2.536(2)                | 2.5468(11)                      | 2.5297(8)                             | 2.5463(8)             | 2.7009(6)                | 2.4153(14)            |
| Angles (degrees)          |                        |                         |                                 |                                       |                       |                          |                       |
| C(0)-Ru-X                 | 123.3 <sub>0</sub>     | 123.3                   | 121.7                           | 123.2                                 | 122.7                 | 120.5                    | 121.4                 |
| C(0)-Ru-C(CO)             | 124.6,<br>126.4        | 125.3,<br>126.2         | 124.1,<br>125.5                 | 126.0,<br>127.6                       | 125.3,<br>125.9       | 126.3,<br>126.7          | 124.0,<br>127.4       |
| C(CO)-Ru-C(CO)            | 91.01(14)              | 91.0(7)                 | 93.7(3)                         | 91.9(3)                               | 92.3(3)               | 92.1(3)                  | 90.4(3)               |
| X-Ru-C(CO)                | 90.81(11),<br>90.24(9) | 90.8(5),<br>89.7(5)     | 91.2(3),<br>91.1(3)             | 88.1(2),<br>87.8(2)                   | 90.8(2),<br>89.5(2)   | 90.9(2),<br>89.9(2)      | 92.6(2),<br>91.2(2)   |

\*Data for the Os, Cl complex is also included. †Data for the major component (Cp disordered).

(b) Cp' complexes

| $\text{X}^{(\text{Ref})}$ | Cl                    | Br (298 K) <sup>12</sup> | Br*                   | I (298 K) <sup>12</sup> | I                     |
|---------------------------|-----------------------|--------------------------|-----------------------|-------------------------|-----------------------|
| Distances (Å)             |                       |                          |                       |                         |                       |
| Ru-C(Cp')                 | 2.191(2)              | 2.183(5)                 | 2.201(2)              | 2.188(7)                | 2.189(4)              |
|                           | -2.300(2)             | -2.303(7)                | -2.288(2)             | -2.306(10)              | -2.303(4)             |
| < >                       | 2.24                  | 2.23                     | 2.24                  | 2.24                    | 2.24                  |
| Ru-C(0)(Cp')              | 1.87 <sub>8</sub>     | 1.87 <sub>7</sub>        | 1.88 <sub>1</sub>     | 1.88 <sub>7</sub>       | 1.88 <sub>3</sub>     |
| Ru-C(CO)                  | 1.893(2),<br>1.892(2) | 1.885(6),<br>1.881(6)    | 1.895(2),<br>1.881(6) | 1.874(8),<br>1.882(9)   | 1.893(4),<br>1.892(4) |
| Ru-X                      | 2.4062(5)             | 2.535(2)                 | 2.5005(6)             | 2.7030(4)               | 2.7104(6)             |
| Angles (degrees)          |                       |                          |                       |                         |                       |
| C(0)-Ru-X                 | 121.8                 | 122.6                    | 123.0                 | 123.1                   | 122.8                 |
| C(0)-Ru-C(CO)             | 125.6,<br>125.5       | 124.2,<br>127.7          | 125.3,<br>126.8       | 124.9,<br>127.5         | 124.3,<br>128.1       |
| C(CO)-Ru-C(CO)            | 91.77(8)              | 90.4(3)                  | 91.1(2)               | 90.6(4)                 | 90.7(2)               |
| X-Ru-C(CO)                | 90.94(6),<br>91.36(7) | 92.6(2),<br>88.8(2)      | 90.9(8),<br>88.9(2)   | 91.6(3),<br>88.2(3)     | 92.0(1),<br>88.1(1)   |

\*Values quoted for the present bromide are for the major component of disorder. The values for the iodide redetermination are harmonious with the previous,<sup>12</sup> but offer improved precision at lower temperature.

**Table S3.** Coordination geometries, [Cp<sup>x</sup>Ru(CO)<sub>2</sub>Cl]

Data for [Cp<sup>\*</sup>Ru(CO)<sub>2</sub>Me] are included for comparison

| Cp <sup>x</sup> /X | Cp/Cl               | Cp'/Cl              | Cp <sup>*</sup> /Cl( <i>P</i> 2 <sub>1</sub> / <i>n</i> ) | Cp <sup>*</sup> /Cl( <i>P</i> 1̄) | Cp <sup>*</sup> /Me |
|--------------------|---------------------|---------------------|-----------------------------------------------------------|-----------------------------------|---------------------|
| Distances (Å)      |                     |                     |                                                           |                                   |                     |
| Ru-C(Cp)           | 2.191(3)            | 2.191(2)            | 2.200(1)                                                  | 2.212(2)                          | 2.253(1)            |
|                    | -2.258(3)           | -2.300(2)           | -2.247(1)                                                 | -2.264(2)                         | -2.280(1)           |
| < >                | 2.22 <sub>3</sub>   | 2.23 <sub>7</sub>   | 2.23 <sub>4</sub>                                         | 2.24 <sub>1</sub>                 | 2.26 <sub>7</sub>   |
| Ru-C(0)(Cp)        | 1.87 <sub>2</sub>   | 1.87 <sub>8</sub>   | 1.86 <sub>8</sub>                                         | 1.87 <sub>7</sub>                 | 1.90 <sub>9</sub>   |
| Ru-C(CO)           | 1.883(7),           | 1.893(2),           | 1.887(2),                                                 | 1.852(4),                         | 1.877(1),           |
|                    | 1.890(3)            | 1.892(2)            | 1.891(2)                                                  | -1.866(9)                         | 1.880(1)            |
| Ru-X               | 2.4110(8)           | 2.4062(5)           | 2.4315(4)                                                 | 2.4407(11)                        | 2.144(2)            |
| Angles (degrees)   |                     |                     |                                                           |                                   |                     |
| C(0)-Ru-X          | 123. <sub>3</sub>   | 121. <sub>8</sub>   | 120. <sub>1</sub>                                         | 120. <sub>6</sub>                 | 121. <sub>0</sub>   |
| C(0)-Ru-C(CO)      | 124. <sub>6</sub> , | 125. <sub>6</sub> , | 124. <sub>7</sub> ,                                       | 124. <sub>5</sub> ,               | 128. <sub>2</sub> , |
|                    | 126. <sub>4</sub>   | 125. <sub>5</sub>   | 124. <sub>4</sub>                                         | 126. <sub>4</sub>                 | 127. <sub>7</sub>   |
| C(CO)-Ru-C(CO)     | 91.01(14)           | 91.77(8)            | 92.52(7)                                                  | 90.73(10)                         | 90.32(5)            |
| X-Ru-C(CO)         | 90.81(11),          | 90.94(6),           | 92.34(5),                                                 | 93.08(5),                         | 87.92(6),           |
|                    | 90.24(9)            | 91.36(7)            | 94.24(5)                                                  | 92.28(12)                         | 89.76(6)            |

\*Major component

**Table S4.** Coordination geometries, [Cp<sup>Ph</sup>Ru(CO)<sub>2</sub>X] (X = Cl, I)

Values for the Cp counterparts are included for comparison, also that for [Cp<sup>Ph</sup>Ru(CO)<sub>2</sub>H](·½CH<sub>2</sub>Cl<sub>2</sub>)

| Cp <sup>x</sup> /X | Cp/Cl             | Cp <sup>Ph</sup> /Cl(·½CH <sub>2</sub> Cl <sub>2</sub> ) (mols. 1,2) | Cp/I              | Cp <sup>Ph</sup> /I <sup>14</sup> | Cp <sup>Ph</sup> /H <sup>14</sup> |
|--------------------|-------------------|----------------------------------------------------------------------|-------------------|-----------------------------------|-----------------------------------|
| Distances (Å)      |                   |                                                                      |                   |                                   |                                   |
| Ru-C(Cp)           | 2.191(3)          | 2.211(3); 2.212(3)                                                   | 2.213(8)          | 2.234(3)                          | 2.251(3)                          |
|                    | -2.258(3)         | -2.310(3); -2.321(3)                                                 | -2.271(3)         | -2.317(3)                         | -2.286(3)                         |
| < >                | 2.22 <sub>3</sub> | 2.26; 2.25                                                           | 2.24              | 2.26 <sub>5</sub>                 | 2.27                              |
| Ru-C(0)(Cp)        | 1.87 <sub>2</sub> | 1.90 <sub>0</sub> , 1.89 <sub>1</sub>                                | 1.88 <sub>3</sub> | 1.90 <sub>2</sub>                 | 1.91 <sub>1</sub>                 |
| Ru-C(CO)           | 1.883(7),         | 1.881(5), 1.879(5))                                                  | 1.869(6),         | 1.866(4),                         | 1.795(5)                          |
|                    | 1.890(3)          | 1.912(4); 1.889(5)                                                   | 1.865(6)          | 1.879(4)                          | 1.811(5)                          |
| Ru-X               | 2.4110(8)         | 2.4118(11); 2.3967(10)                                               | 2.7009(6)         | 2.7230(4)                         | 1.55(3)                           |
| Angles (degrees)   |                   |                                                                      |                   |                                   |                                   |
| C(0)-Ru-X          | 123. <sub>3</sub> | 124. <sub>7</sub> , 123. <sub>1</sub>                                | 120. <sub>5</sub> | 128. <sub>0</sub>                 | 125                               |
| C(0)-Ru-C(CO)      | 124. <sub>6</sub> | 127. <sub>3</sub> , 127. <sub>4</sub>                                | 126. <sub>3</sub> | 126. <sub>8</sub>                 | 133. <sub>4</sub>                 |
|                    | 126. <sub>4</sub> | 128. <sub>7</sub> , 128. <sub>0</sub>                                | 126. <sub>7</sub> | 127. <sub>6</sub>                 | 130. <sub>9</sub>                 |
| C(CO)-Ru-(CO)      | 91.01(14)         | 87.10(6); 89.0(2)                                                    | 92.1(3)           | 90.61(18)                         | 89.3(2)                           |
| X-Ru-C(CO)         | 90.81(11)         | 88.74(12); 89.51(13)                                                 | 90.9(2),          | 84.23(12)                         | 74.9(10)                          |
|                    | 90.24(9)          | 87.16(14); 87.60(16)                                                 | 89.9(2)           | 85.55(13)                         | 82.8(10)                          |

**Table S5** Theoretical Geometric Parameters for the Ru(MeCp)(CO)<sub>2</sub>X complexes, where X = Cl, Br, and I calculated at the MP2 level of theory with 6-311G basis sets for C, H, O, Cl, and Br, and the LANLDZ basis set and ECP for Ru and I. Provided are bond lengths in Ångström and bond angles in degrees.

|        | r(Ru-X) | r(Ru-CO) | r(Ru-Cp) | ∠(X-Ru-CO) | ∠(CO-Ru-CO) | ∠(X-Ru-Cp) | r(C-H) <sub>Cp</sub> | R(C-C) | R(C-H) <sub>Me</sub> |
|--------|---------|----------|----------|------------|-------------|------------|----------------------|--------|----------------------|
| Chloro | 2.474   | 1.866    | 1.927    | 90.0       | 90.9        | 119.4      | 1.082<br>1.081       | 1.496  | 1.097<br>1.093       |
| Bromo  | 2.549   | 1.862    | 1.930    | 89.7       | 90.9        | 119.7      | 1.082<br>1.081       | 1.497  | 1.097<br>1.093       |
| Iodo   | 2.719   | 1.858    | 1.938    | 89.7       | 90.9        | 119.9      | 1.082<br>1.081       | 1.498  | 1.098<br>1.093       |

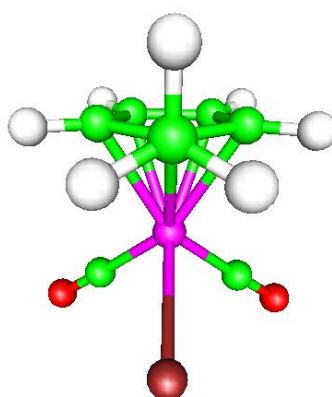

Figure S1. The optimised geometries of the one of the complexes is shown above.

**Tables S6-S8:** Calculated Atomic charges for the Chloro, Bromo, and Iodo complex, at the MP2 level of theory. Charges on hydrogens have been summed onto the associated Carbon atom. Also provided are the sums of the C and O charges for the carbonyls ligands.

**[Note: The numbering of the carbons starts with the C attached to the methyl, and then goes clockwise looking down from the top C10 is the methyl carbon]**

**Table S5:** Chloro data

|      | Mulliken | NBO      | Hirshfeld |
|------|----------|----------|-----------|
| C1   | 3.16E-4  | 0.06704  | 0.00805   |
| C2   | -0.01402 | 0.01172  | 0.01242   |
| C3   | -0.01507 | 0.02448  | 0.0146    |
| C4   | -0.01506 | 0.0245   | 0.01461   |
| C5   | -0.0141  | 0.02448  | 0.01236   |
| H6   | 0.0      | 0.0      | 0.0       |
| H7   | 0.0      | 0.0      | 0.0       |
| H8   | 0.0      | 0.0      | 0.0       |
| H9   | 0.0      | 0.0      | 0.0       |
| C10  | 0.07197  | 0.05185  | 0.06609   |
| H11  | 0.0      | 0.0      | 0.0       |
| H12  | 0.0      | 0.0      | 0.0       |
| H13  | 0.0      | 0.0      | 0.0       |
| Ru14 | 0.46512  | -0.07675 | 0.15135   |
| Cl15 | -0.49928 | -0.47787 | -0.47642  |

|               |                |                |                |
|---------------|----------------|----------------|----------------|
| C16           | 0.17756        | 0.40526        | 0.22661        |
| O17           | -0.1675        | -0.22356       | -0.12831       |
| <b>CO Sum</b> | <b>0.01006</b> | <b>0.1817</b>  | <b>0.0983</b>  |
| C18           | 0.17756        | 0.40527        | 0.2266         |
| O19           | -0.1675        | -0.22356       | -0.12831       |
| <b>CO Sum</b> | <b>0.01006</b> | <b>0.18171</b> | <b>0.09829</b> |

**Table S6:** Bromo data

|               | <b>Mulliken</b> | <b>NBO</b>     | <b>Hirshfeld</b> |
|---------------|-----------------|----------------|------------------|
| C1            | -9.31E-4        | 0.06662        | 0.00346          |
| C2            | -0.01707        | 0.01032        | 0.00797          |
| C3            | -0.01349        | 0.02842        | 0.01486          |
| C4            | -0.01341        | 0.02853        | 0.01495          |
| C5            | -0.01714        | 0.01017        | 0.0079           |
| H6            | 0.0             | 0.0            | 0                |
| H7            | 0.0             | 0.0            | 0                |
| H8            | 0.0             | 0.0            | 0                |
| H9            | 0.0             | 0.0            | 0                |
| <b>C10</b>    | <b>0.06673</b>  | <b>0.04757</b> | <b>0.06177</b>   |
| <b>H11</b>    | <b>0.0</b>      | <b>0.0</b>     | <b>0</b>         |
| <b>H12</b>    | <b>0.0</b>      | <b>0.0</b>     | <b>0</b>         |
| <b>H13</b>    | <b>0.0</b>      | <b>0.0</b>     | <b>0</b>         |
| Ru14          | 0.32627         | -0.20946       | 0.10779          |
| Br15          | -0.3293         | -0.33116       | -0.37894         |
| C16           | 0.17399         | 0.40512        | 0.21658          |
| O17           | -0.17481        | -0.23062       | -0.13649         |
| <b>CO Sum</b> | <b>-8.2E-4</b>  | <b>0.1745</b>  | <b>0.08009</b>   |
| C18           | 0.17398         | 0.40511        | 0.21657          |
| O19           | -0.17481        | -0.23062       | -0.13649         |
| <b>CO Sum</b> | <b>-8.3E-4</b>  | <b>0.17449</b> | <b>0.08008</b>   |

**Table S7:** Iodo Data

|            | <b>Mulliken</b> | <b>NBO</b>     | <b>Hirshfeld</b> |
|------------|-----------------|----------------|------------------|
| C1         | -0.136451       | 0.03151        | 0.03441          |
| C2         | 0.126526        | 0.00766        | 0.01956          |
| C3         | -0.052017       | 0.05636        | 0.0429           |
| C4         | -0.052045       | 0.05640        | 0.04291          |
| C5         | 0.126479        | 0.00760        | 0.01947          |
| H6         | -0.010958       | -0.85450       | -0.01754         |
| H7         | 0.0             | 0.0            | 0                |
| H8         | 0.0             | 0.0            | 0                |
| H9         | 0.0             | 0.0            | 0                |
| <b>C10</b> | <b>0.059514</b> | <b>0.08465</b> | <b>0.07486</b>   |
| <b>H11</b> | <b>0.0</b>      | <b>0.0</b>     | <b>0.0</b>       |
| <b>H12</b> | <b>0.0</b>      | <b>0.0</b>     | <b>0</b>         |
| <b>H13</b> | <b>0.0</b>      | <b>0.0</b>     | <b>0</b>         |
| Ru14       | 0.0             | 0.0            | 0                |
| I15        | -0.120405       | -0.19879       | -0.36923         |

|           |           |          |          |
|-----------|-----------|----------|----------|
| C16       | 0.427693  | 0.94037  | 0.25552  |
| O17       | -0.398022 | -0.53581 | -0.17888 |
| CO<br>Sum | 0.029671  | 0.40456  | 0.07664  |
| C18       | 0.427700  | 0.94037  | 0.25553  |
| O19       | -0.398014 | -0.53581 | -0.17888 |
| CO<br>Sum | 0.029686  | 0.40456  | 0.07665  |

1. K. J. Jens and E. Weiss, *Acta Crystallogr., Sect. C: Cryst. Struct. Commun.*, 1985, **C41**, 895-896.
2. H. Adams, N. A. Bailey and C. White, *Inorg. Chem.*, 1983, **22**, 1155-1158.
3. R. O. Fuller, C. S. Griffith, G. A. Koutsantonis, K. M. Lapere, B. W. Skelton, M. A. Spackman, A. H. White and D. A. Wild, *CrystEngComm*, 2011.
4. M. D. Bala, A. Munyaneza and N. J. Coville, *Acta Cryst. E.*, 2006, **62**, m1538-m1539.
5. D. Duraczynska and J. H. Nelson, *Dalton Trans.*, 2003, 449-457.
